# Supplementary material for: Drinking Water Supplemented with Acidifiers Improves the Growth Performance of Weaned Pigs and Potentially Regulates Antioxidant Capacity, Immunity, and Gastrointestinal Microbiota Diversity
Source: MDPI journal article supplement (doi:10.3390/antiox11050809), 2022-04-21
Supplement: s1 [file s1]

## Tables

**Table S1** Experimental diet composition and nutrients (as-fed basis, %)

| Item                           | Content |
|--------------------------------|---------|
| Ingredients                    |         |
| ...Corn                        | 54.0    |
| ...Soybean meal                | 23.0    |
| ...Whey power                  | 10.00   |
| ...Fish meal                   | 6.00    |
| ...Glucose                     | 2.00    |
| ...Yeast                       | 2.00    |
| ...Limestone                   | 0.9     |
| ...Soybean oil                 | 0.70    |
| ...CaHPO <sub>4</sub>          | 0.4     |
| ...Nacl                        | 0.3     |
| ...L-lys                       | 0.1     |
| ...Zinc oxide                  | 0.1     |
| ...Vitamin premix <sup>1</sup> | 0.5     |
| Calculated nutrients           |         |
| ...Digest energy, Mcal/kg      | 3.50    |
| ...Crude protein               | 20.0    |
| ...Digestible lysine           | 1.50    |
| ...Crude Ash                   | 7.0     |
| ...Available phosphorus        | 0.55    |
| ...Available Ca                | 0.5-1.2 |
| Nacl                           | 0.3-0.8 |

<sup>1</sup>Vitamin premix provided the following per kilogram diet: vitamin A, 8.5 MIU; vitamin D, 1,900 IU as vitamin D3; vitamin E, 24 IU, vitamin K3, 2.2 mg, vitamin B1 2 mg, vitamin B2 5 mg, vitamin B6 3 mg, vitamin B12 0.03 mg, vitamin B3 24 mg, vitamin B5 12 mg, vitamin B9 1 mg, vitamin B7 0.1 mg, vitamin C 36 mg.
